# Supplementary material for: The ArfGAP2/3 Glo3 and ergosterol collaborate in transport of a subset of cargoes
Source: Biol Open. 2015 May 11;4(7):792–802. doi: 10.1242/bio.011528 (PMC4571087; doi:10.1242/bio.011528)
Supplement: Supplementary Material [file supp_bio.011528_BIO011528supp.pdf]

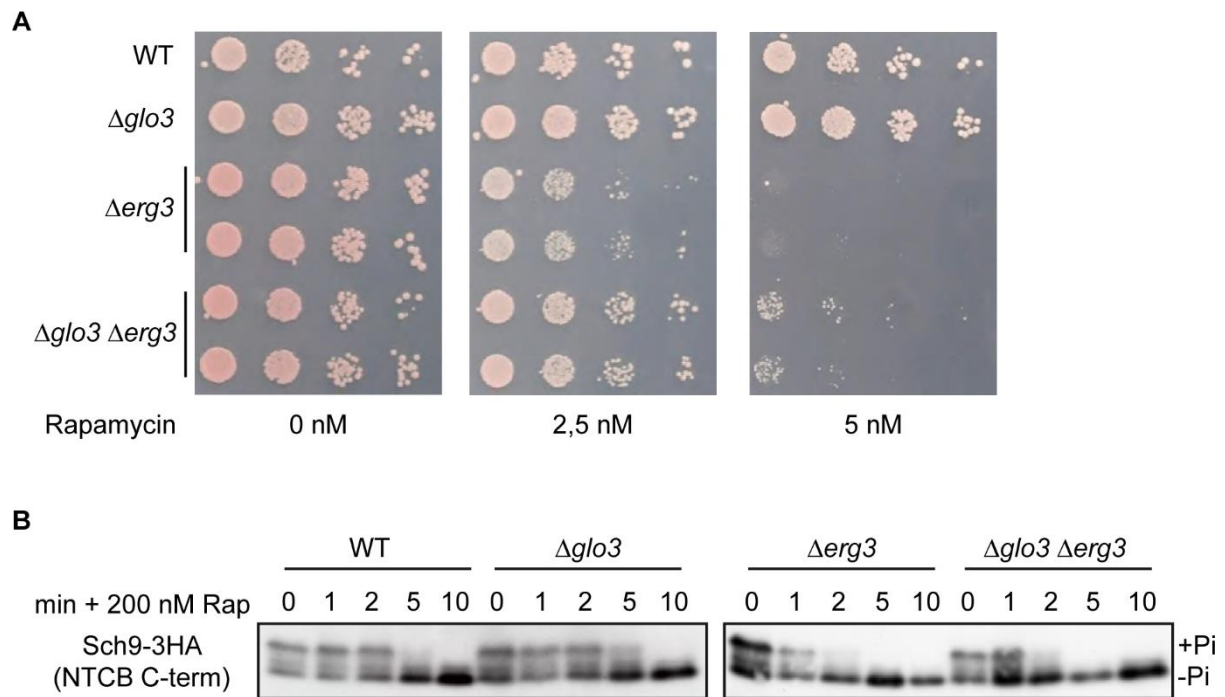

**Supplementary material Fig. S1. Loss of Glo3 partially rescues the  $\Delta erg3$  rapamycin sensitivity.** (A)  $\Delta glo3 \Delta erg3$  cells are less rapamycin-sensitive than  $\Delta erg3$  cells. Drop assay of indicated strains on plates containing different concentrations of rapamycin. (B) Deletion of *GLO3* does not rescue the faster Sch9 dephosphorylation in  $\Delta erg3$  cells upon rapamycin treatment. Immunoblot of Sch9-3HA C-terminal NTCB cleaved fragment after various times after rapamycin treatment. Sch9 is more rapidly dephosphorylated in  $\Delta erg3$  cells when compared to wild type. This kinetics is not drastically altered in the  $\Delta glo3 \Delta erg3$  double mutant.

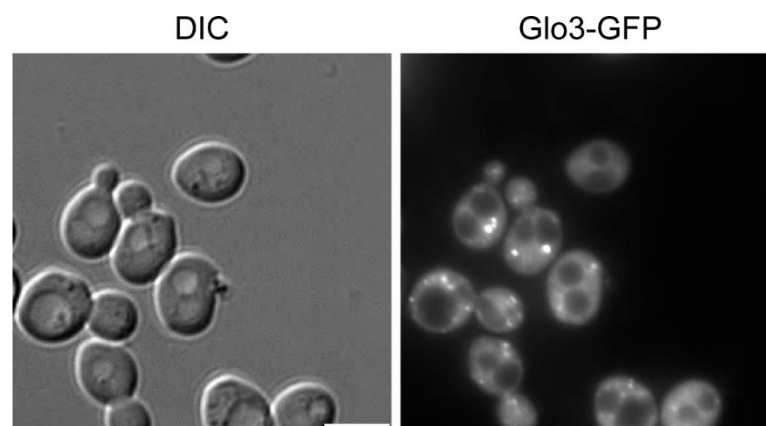

**Supplementary material Fig. S2. Glo3 exists in a soluble and membrane associated state.** Live cell imaging of cells expressing Glo3-GFP from the endogenous locus. Scale bar represents 5  $\mu$ m.

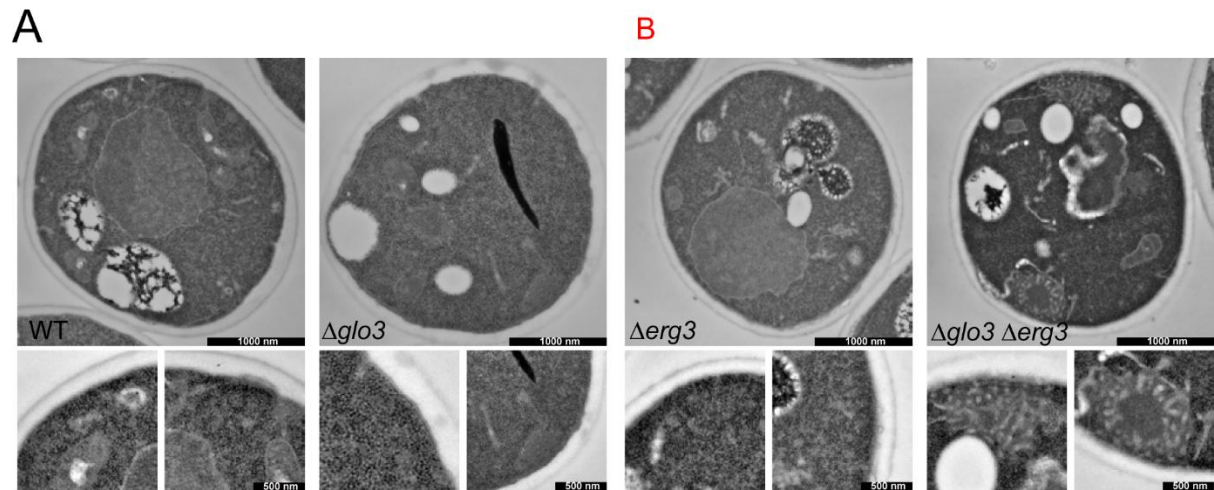

**Supplementary material Fig. S3. Pma1 ER aggregation is not due to the GFP tag.** Electron microscopy analysis of strains expressing Pma1 without a tag. The scale bar in the low magnification is 1  $\mu$ m and for the enlargements 500 nm.

**Table S1     Strains used in this study**

| <b>Designation</b> | <b>Genotype</b>                                                                                  | <b>Source</b>  |
|--------------------|--------------------------------------------------------------------------------------------------|----------------|
| RSY367             | <i>MATa leu2-3,112 ura3-1 his3-11,15 trp1-1 ade2-1</i>                                           | Randy Schekman |
| YAS2734            | <i>MATa leu2-3,112 ura3-1 his3-11,15 trp1-1 ade2-1 GLO3::GLO3-HBH-TRP1</i>                       | This study     |
| PPY51              | <i>MATa leu2-3,112 ura3-1 his3-11,15 trp1-1 ade2-1 glo3::HIS3</i>                                | Pak Phi Poon   |
| YAS3295            | <i>MATa leu2-3,112 ura3-1 his3-11,15 trp1-1 ade2-1 erg3::LEU2</i>                                | This study     |
| YAS3317            | <i>MATa leu2-3,112 ura3-1 his3-11,15 trp1-1 ade2-1 glo3::HIS3 erg3::LEU2</i>                     | This study     |
| YAS3103            | <i>MATa leu2-3,112 ura3-1 his3-11,15 trp1-1 ade2-1 HXT2::HXT2-GFP-TRP1</i>                       | This study     |
| YAS3104            | <i>MATa leu2-3,112 ura3-1 his3-11,15 trp1-1 ade2-1 glo3::HIS3 HXT2::HXT2-GFP-TRP1</i>            | This study     |
| YAS3133            | <i>MATa leu2-3,112 ura3-1 his3-11,15 trp1-1 ade2-1 erg3::LEU2 HXT2::HXT2-GFP-TRP1</i>            | This study     |
| YAS3105            | <i>MATa leu2-3,112 ura3-1 his3-11,15 trp1-1 ade2-1 glo3::HIS3 erg3::LEU2 HXT2::HXT2-GFP-TRP1</i> | This study     |
| YAS2969            | <i>MATa leu2-3,112 ura3-1 his3-11,15 trp1-1 ade2-1 GLO3::GLO3-GFP-KanMX4</i>                     | This study     |

**Table S2     Plasmids used in this study**

| <b>Plasmid</b>                                        | <b>Marker / Promoter</b>     | <b>Source</b>  |
|-------------------------------------------------------|------------------------------|----------------|
| pJG4-5- <i>ARF1</i>                                   | TRP1, amp <sup>R</sup> / GAL | This study     |
| pEG202- <i>GLO3</i>                                   | HIS, amp <sup>R</sup> / ADH1 | This study     |
| pJG4-5- <i>PUB1</i>                                   | TRP, amp <sup>R</sup> / GAL  | This study     |
| pJG4-5- <i>ERG3</i>                                   | TRP, amp <sup>R</sup> / GAL  | This study     |
| pRS426 <i>GPD</i> -Tat2-GFP                           | URA3, amp <sup>R</sup> / GPD | This study     |
| pRS416-Sch9-3HA                                       | URA3, amp <sup>R</sup>       | Micheal N Hall |
| p426TEF- <i>GAP1</i> -GFP                             | URA3, amp <sup>R</sup> / TEF | This study     |
| pRS413                                                | HIS3, amp <sup>R</sup>       | Micheal N Hall |
| YCplac22                                              | TRP1, amp <sup>R</sup>       | Micheal N Hall |
| YCplacIII                                             | LEU2, amp <sup>R</sup>       | Micheal N Hall |
| pRS315-Chs3-GFP                                       | LEU2, amp <sup>R</sup>       | Cesar Roncero  |
| pGAL39ΔBgIII- <i>CPY</i> -GFP                         | URA3, amp <sup>R</sup> / GAL | Oliver Deloche |
| pGFP195- <i>PMA1</i> -GFP                             | URA3, amp <sup>R</sup>       | This study     |
| pGFP195- <i>PMA1</i>                                  | URA3, amp <sup>R</sup>       | This study     |
| p424GPD- <i>SEC63</i> -RFP                            | TRP1, amp <sup>R</sup> / GPD | This study     |
| p416- <i>SNC1</i> -GFP                                | TRP1, amp <sup>R</sup>       | Nava Segev     |
| p416- <i>SNC1PEM</i> -GFP                             | TRP1, amp <sup>R</sup>       | Nava Segev     |
| p424GPD- <i>TRP1</i>                                  | TRP1, amp <sup>R</sup> / GPD | Euroscarf      |
| p424GPD- <i>GLO3-TRP1</i>                             | TRP1, amp <sup>R</sup> / GPD | This study     |
| p424GPD- <i>glo3</i> <sup>1-214</sup> - <i>TRP1</i>   | TRP1, amp <sup>R</sup> / GPD | This study     |
| p424GPD- <i>glo3</i> <sup>214-375</sup> - <i>TRP1</i> | TRP1, amp <sup>R</sup> / GPD | This study     |
| p424GPD- <i>glo3</i> <sup>R59K</sup> - <i>TRP1</i>    | TRP1, amp <sup>R</sup> / GPD | This study     |
| p424GPD- <i>GCSI-TRP1</i>                             | TRP1, amp <sup>R</sup> / GPD | This study     |
